# Supplementary material for: Impact of the Late Miocene Cooling on the loss of coral reefs in the Central Indo-Pacific
Source: Copernicus journal article supplement (doi:10.5194/cp-21-405-2025), 2025-02-07
Supplement: Supplementary file 1 [file cp-21-405-2025-supplement.pdf]

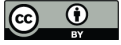

*Supplement of*

## **Impact of the Late Miocene Cooling on the loss of coral reefs in the Central Indo-Pacific**

**Benjamin F. Petrick et al.**

*Correspondence to:* Benjamin F. Petrick ([benjamin.petrick@ifg.uni-kiel.de](mailto:benjamin.petrick@ifg.uni-kiel.de))

The copyright of individual parts of the supplement might differ from the article licence.

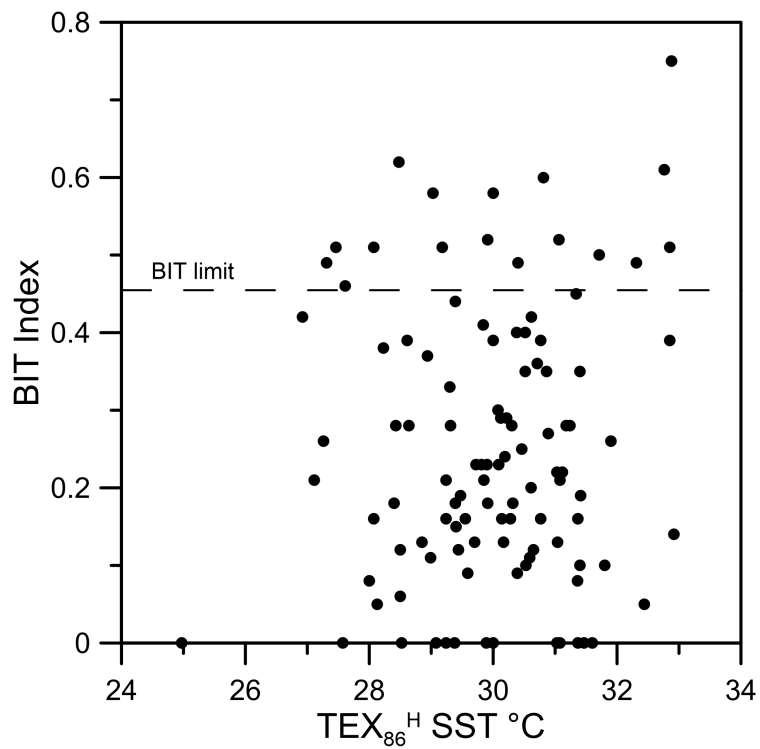

Figure S1: BIT compared to TEX<sub>86</sub><sup>H</sup> SST values.
